# Supplementary material for: Wind waves in the North Atlantic from ship navigational radar: SeaVision development and its validation with Spotter wave buoy and WaveWatch III
Source: Copernicus journal article supplement (doi:10.5194/essd-2021-431), 2021-12-16
Supplement: Supplementary file [file essd-2021-431-AC4-supplement.pdf]

Response to Dr. Vladimir Karaev

We thank Dr. Vladimir Karaev for evaluation of the manuscript and useful suggestions. Below we provide our replies in a point-by-point manner with the responses given in blue and the comments of Vladimir Karaev given in italic black.

**VK:** *About formula (1). These coefficients (A and B) are unique properties of each radar and constant or it is necessary to do a calculation of coefficients for every experiment? Which physical background for such approximation? Please, give more information.*

**AC:** Thank you for this comment. In the revised MS we provide the description of the methodology for calculation of the calibration coefficients A and B along with the physical background behind these computations and the actual values of these coefficients given in Table 2. All these details are now given in Section 2.2.2 of the revised MS.

**VK:** *Fig. 5 and Fig. 6. It is interesting to see a result of comparison for each cruise separately. Is there a difference?*

**AC:** We thank the Dr. Vladimir Karaev for this suggestion, we added information on the comparisons of the significant wave heights differences across different cruises separately for each cruise in Table 4:

**Table 4: Differences in significant wave height estimates for the three cruises.**

| Mean difference in $H_s$ (m) | ASV50 | AI57  | AI58  |
|------------------------------|-------|-------|-------|
| Spotter - SeaVision          | 0.27  | 0.05  | -0.06 |
| WW3 - SeaVision              | -0.24 | -0.24 | -0.36 |

**VK:** *Fig. 4. It is no enough for comparison. Is it possible to compare the wave spectrums (radar, buoy and WWIII)?*

**AC:** Thank you for this comment. In the dataset, which supports this manuscript we provide digital data for 1D wave energy spectrum which can be easily plotted from the netcdf files. In this manuscript our goal was to present SeaVision system together with the dataset of wind wave observations rather than analyse the nature of the differences between these three data sources. Thus, while we do not provide extensive analysis of the spectrum estimates on the basis of the different data sources, we nevertheless discuss in details differences in wind wave parameters for each location pointing to e.g. large drift cases.
